# Supplementary material
Source: Springer Nature journal article supplement (https://www.springermedizin.de/resource/supplementary/12889_2008_1124_MOESM1_ESM.pdf/9502504)

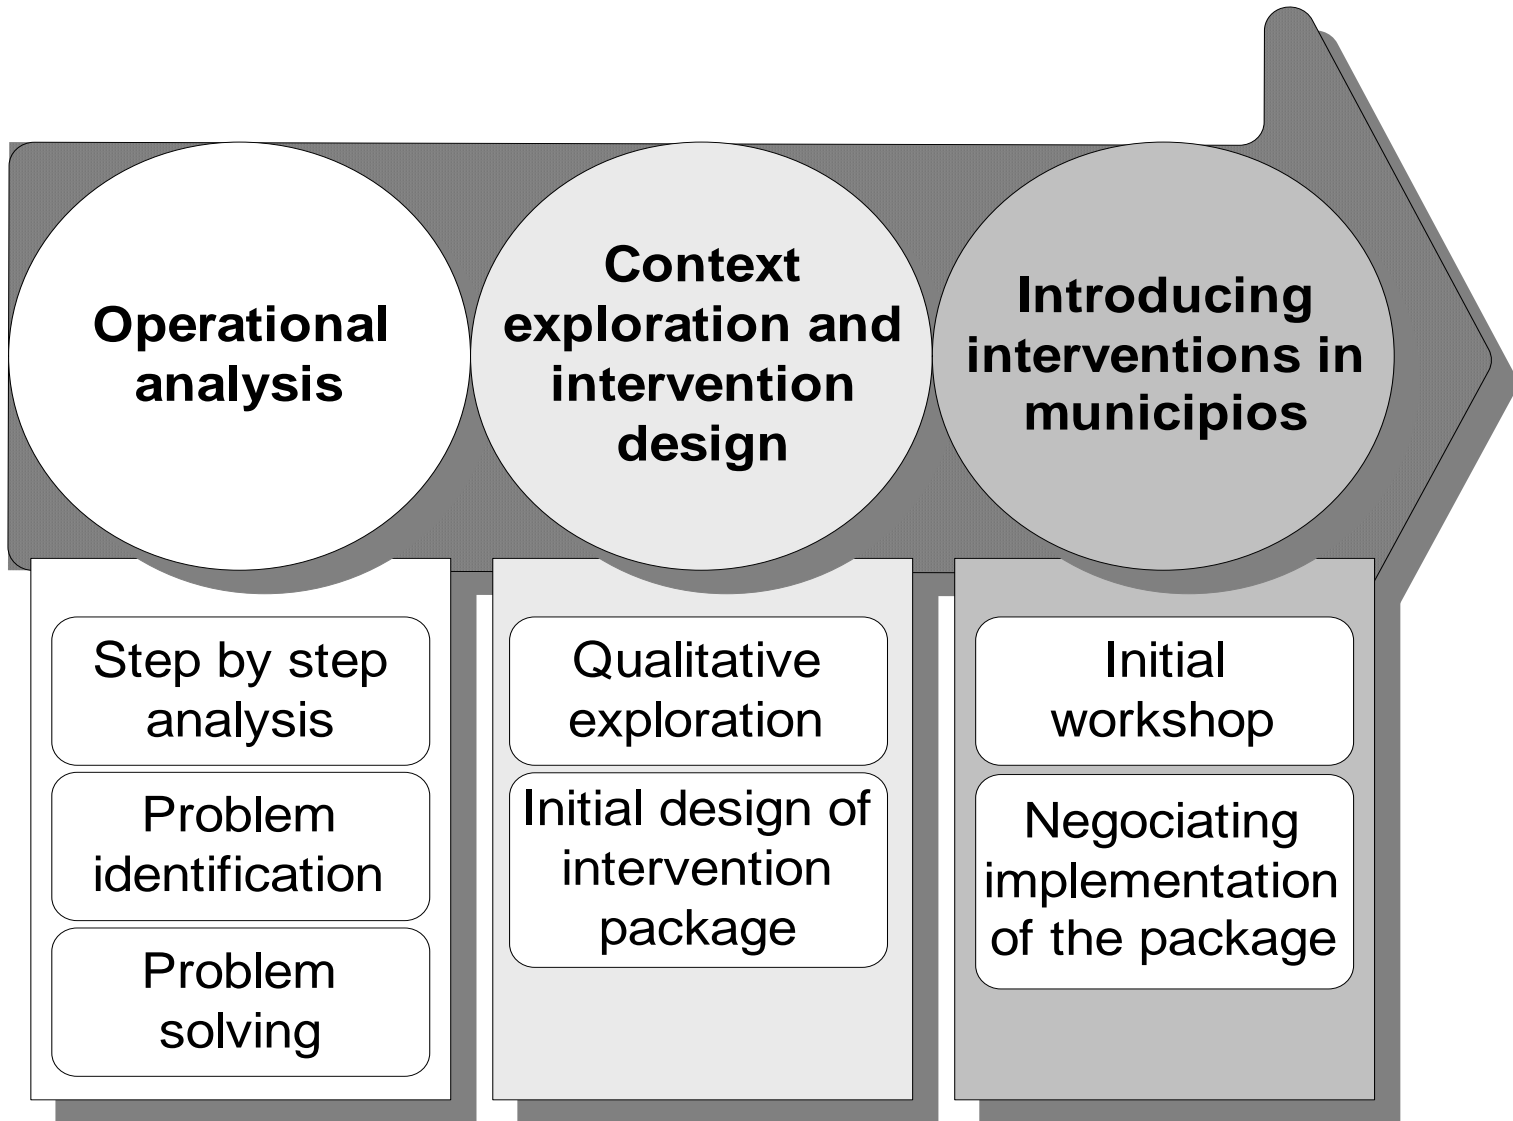

Supplement: MOESM1 [file 9502504]
